# Supplementary material for: The Interactomes of Influenza Virus NS1 and NS2 Proteins Identify New Host Factors and Provide Insights for ADAR1 Playing a Supportive Role in Virus Replication
Source: PLoS Pathog. 2013 Jul 4;9(7):e1003440. doi: 10.1371/journal.ppat.1003440 (PMC3701712; doi:10.1371/journal.ppat.1003440)
Supplement: Table S4 — List of host proteins identified in Y2H screens and their impact on virus replication and type I interferon β production. Data are normalized to controls. NT: not tested. ND: not detectable. The control value in this experiment is 2 pg/ml. The detection limit corresponds to 1.2 pg/ml. Therefore we cannot conclude that a gene is a positive regulator when its silencing leads to a not-detectable level of IFN. (XLS) [file ppat.1003440.s004.xls]

## Sheet: Feuil1
									A/H1N1/Puerto Rico/8/1934			A/H1N1/New Caledonia/2006
			Silencing		5'-3' primer sequences		Resazurin Assay		neuraminidase activity		PFUs	neuraminidase activity		IFNbeta production
	siRNA sense sequence	siRNA antisense sequence	% knockdown	SD	Forward primer	Reverse primer	Mean /control	SD	Mean/control	SD	/control	Mean/control	SD	/control
ADAR1/1	CCGCUCCCAUGGCUUUGCUGCUGAA	UUCAGCAGCAAAGCCAUGGGAGCGG	83	3	TCCTGCAGCCCATTTATCTC	TCCTCAAATGCACTCCCATC	0.955473	0.0577318	0.634203	0.0354528	0.260981	0.594145	0.0620358	10
ADAR1/2	CCAGACUGCGAAGGAUAGUAUAUUU	AAAUAUACUAUCCUUCGCAGUCUGG	80	6			0.977776	0.031399	0.584683	0.186227		0.49217	0.0358835	8.3
AIMP2/1	ACGUCUGUAUGAGUUGAAAGCUGCA	UGCAGCUUUCAACUCAUACAGACGU	79	7	TAAAGCCCTATCACGGGGGC	CAAGAGCTTGCAGAGACAGGT	1.08613	0.0314331	1.25551	0.241273	1.20537	1.81049	0.617092	1.2
AIMP2/2	ACACCAGAUGCAGACUUGGAUGUAA	UUACAUCCAAGUCUGCAUCUGGUGU	92	3			1.01237	0.0254635	0.972528	0.163796		0.817187	0.0876817	87.4
AP2B1/1	CCGAACUACGUAUCCAGCCAGGAAA	UUUCCUGGCUGGAUACGUAGUUCGG	25	8	TTGGTTCTTTGGCCTCTGTG	AGGTTCGTTGCAGTGGTAGTG	0.988603	0.00522089	0.981087	0.144219	1.2219	0.717986	0.103896	0.2
AP2B1/2	CAUCAUGAUUCGUUUGGCAUCUCAA	UUGAGAUGCCAAACGAAUCAUGAUG	n.s.				0.98362	0.0136154	1.00185	0.12201		1.48026	0.124136	16.2
ARNT/1	GGGAACUGGCAACACAUCCACUGAU	AUCAGUGGAUGUGUUGCCAGUUCCC	49	17	AGGAACAGATGCAGGAATGG	CATCATCTGGGAGGGAAACAC	0.943215	0.0596381	1.13448	0.553774	0.679658	0.922991	0.0740298	ND
ARNT/2	GCAGCACACUCUAUGAUCAGGUGCA	UGCACCUGAUCAUAGAGUGUGCUGC	41	21			0.99938	0.0219547	0.885524	0.345205		1.25691	0.0713926	ND
ATP6V1G1/1	CAGAGGGAGAAAGAAUUCAAGGCCA	UGGCCUUGAAUUCUUUCUCCCUCUG	89	3	GCCTGCAGAGGGAGAAAGAAT	ACTTCATCCCTGTTCTGCCG	1.01377	0.0256423	0.628838	0.169412	0.00235526	0.532928	0.0346347	19.2
ATP6V1G1/2	CCCGUGGCAGUUGCAGCACUGAAGU	ACUUCAGUGCUGCAACUGCCACGGG	93	3			1.02268	0.0296666	0.609335	0.183049		0.651027	0.14621	33.7
BCL2L1/1	GAUACAGCUGGAGUCAGUUUAGUGA	UCACUAAACUGACUCCAGCUGUAUC	84	3	ATTGGTGAGTCGGATCGCAG	TCTCGGCTGCTGCATTGTTC	0.799928	0.018921	1.27212	0.224524	1.00102	0.961756	0.0553169	2.1
BCL2L1/2	CCCAGUGCCAUCAAUGGCAACCCAU	AUGGGUUGCCAUUGAUGGCACUGGG	62	10			0.758433	0.00232721	0.812293	0.400067		1.02535	0.0786068	ND
BCLAF1/1	CAAGGUCUCGUAGUAGAGAUCGUAU	AUACGAUCUCUACUACGAGACCUUG	72	4	CTGAGGAAGCATACCCGTTTAG	AATGTCATGCCGAAGGTCAG	1.00063	0.014459	0.969092	0.289514	0.720245	1.12255	0.367696	13.1
BCLAF1/2	GGUUAUAGACCUGUCUGGAAUAGAA	UUCUAUUCCAGACAGGUCUAUAACC	89	2			1.09507	0.0166253	1.20901	0.461929		0.893411	0.0979619	10.9
BHLHB9/1	GACCAUAGAUGAGAUUAGACGUCAA	UUGACGUCUAAUCUCAUCUAUGGUC	43	10	CATCCAGAAAAGACCTGAGAGG	CCTCCTCCAACAGCAACC	0.980828	0.0125868	1.69423	0.261389	1.09986	0.583742	0.038337	0.8
BHLHB9/2	UAGCUUACUUAAGUCAACUACUGAU	AUCAGUAGUUGACUUAAGUAAGCUA	25	27			0.962557	0.0213419	1.11552	0.119841		0.924546	0.175891	9.7
BSPRY/1	UCUUCUCUCGCUAUGAUCAGGAGUU	AACUCCUGAUCAUAGCGAGAGAAGA	36	34	AGAAACTTGACACCATCCGC	TTAACATTTCCGACTCCTGGG	0.958885	0.0364186	0.39989	0.144669	0.00250559	0.596104	0.110046	ND
BSPRY/2	CCAGUGCAGCGAGGGAACUGGUUAU	AUAACCAGUUCCCUCGCUGCACUGG	70	7			0.953912	0.0233667	0.412137	0.0830683		0.735724	0.125011	29.4
CARD9/1	GGAAAGUGGGUGUGCUCCUGGACAU	AUGUCCAGGAGCACACCCACUUUCC	n.s.		GACCTGGAAGATGGCTCAC	GCTGCAAAGGGCTGTTTC	0.95107	0.0156437	0.77724	0.135993	0.73955	1.56944	0.0833439	ND
CARD9/2	CCCGCGUCUUCUCCAUGAUCAUCGA	UCGAUGAUCAUGGAGAAGACGCGGG	n.s.				0.996988	0.027173	0.865976	0.193114		1.06266	0.207524	ND
CARS/1	ACAUCGCCCUGUACCUCACCCAUAU	AUAUGGGUGAGGUACAGGGCGAUGU	74	5	ACTGGCTGGATTCTACACTTGG	CATCTGGAGGGAGAACATTCAG	1.00416	0.0273436	0.728089	0.065377	1.14899	0.487676	0.100314	ND
CARS/2	GAUUUGCUCUCUGACUGGCUGGAUU	AAUCCAGCCAGUCAGAGAGCAAAUC	60	10			0.987933	0.0299272	0.646402	0.150083		1.02741	0.169484	ND
CCHCR1/1	CCAAGAGCAGCUGUCCUCUUUGACA	UGUCAAAGAGGACAGCUGCUCUUGG	68	9	CACCATGGCTAAGGTGGAAG	CAAGCTTTCGAGCAATCAGG	0.968381	0.0281509	1.02421	0.19049	1.0199	1.1805	0.200985	ND
CCHCR1/2	CAGGCCUCCAGAGUGUUCAGCAUCU	AGAUGCUGAACACUCUGGAGGCCUG	61	10			0.96662	0.0358967	0.613215	0.145941		0.655068	0.148045	17
CENPC1/1	CAGUGAGUCCAAGAACAAACUUGUA	UACAAGUUUGUUCUUGGACUCACUG	n.s.		GCCATTGGAAAGTGATGAGG	CACTGGTCTGAGGCTTTAGGG	0.993236	0.0418702	0.920711	0.0241239	0.255629	1.03981	0.0480142	2.4
CENPC1/2	CCUGAAGAAGUGACUUCAACUGUCA	UGACAGUUGAAGUCACUUCUUCAGG	33	15			1.02527	0.0559983	1.10723	0.0959807		1.1449	0.0755983	22.2
CENPH/1	GAGAGGAUAAAGAUCAUACGACAAA	UUUGUCGUAUGAUCUUUAUCCUCUC	58	3	ATCAATGGTTGATGCAAGTG	GCAGTTGAAAGTCTCATCC	0.962767	0.0184227	1.54733	0.187612	3.77464	1.99775	0.434181	9
CENPH/2	GGAUCCUGCCCUUAAGGAAAUUGUU	AACAAUUUCCUUAAGGGCAGGAUCC	69	5			0.921542	0.0144294	0.607128	0.138062		0.463346	0.0207444	ND
CEP110/1	GAGAGCCCUGGAAGCAAGAAUGAAU	AUUCAUUCUUGCUUCCAGGGCUCUC	58	12	ATTGCAACGTCCCTGAACAC	CCTTTCTTCCCGCTTCTTTG	0.940414	0.00323753	0.860053	0.323756	1.13481	0.878246	0.168965	ND
CEP110/2	UGUGCUUCCUGAUGGUUCUCCUGUA	UACAGGAGAACCAUCAGGAAGCACA	69	29			0.928256	0.0149974	1.00129	0.39837		0.837737	0.112314	6.9
CHCHD5/1	GGCAGCGGGACUGUCACUACCUUAA	UUAAGGUAGUGACAGUCCCGCUGCC	76	6	AACCGATACCGGAAAAGGCG	ACACACTGGCCATACTGCTC	0.920952	0.0122012	0.579672	0.218942	0.634004	0.261158	0.0108971	ND
CHCHD5/2	GAGCUGGAGCAGUAUGGCCAGUGUG	CACACUGGCCAUACUGCUCCAGCUC	48	18			0.946027	0.0161351	0.802134	0.229965		0.816321	0.26619	ND
COG6/1	CCACAGUGAAAGAGCAGAUCGUAAA	UUUACGAUCUGCUCUUUCACUGUGG	73	8	TATGTTGGCTTGGCTCCATC	CCTTTAGAGGCCTGCACACAC	0.956854	0.0226123	0.901563	0.225955	0.884216	1.00266	0.136578	ND
COG6/2	GCUCAAGUUGCAGAUGCCUUCUUAU	AUAAGAAGGCAUCUGCAACUUGAGC	82	7			0.936521	0.00441936	1.30148	0.501228		0.745253	0.174156	ND
COG8/1	GGAAGACCUUGUUCCGUAUUUAAAU	AUUUAAAUACGGAACAAGGUCUUCC	68	4	CGCTAACTACAAGACCTTCATCCG	TCCTCGGCTTCCTTCACAAAG	0.949189	0.00421929	1.22853	0.453373	1.08628	1.28802	0.139247	ND
COG8/2	CCAUUCCUAAUGAUGAUCCCUAUUU	AAAUAGGGAUCAUCAUUAGGAAUGG	32	17			0.905692	0.00878108	0.897401	0.367765		1.23915	0.209937	ND
CPSF3L/1	UCAAAGAGCUGGGUCUGGCUGAGCA	UGCUCAGCCAGACCCAGCUCUUUGA	37	15	TCATGCTGGACTGTGGAATG	TCCAGGTGGAAGTGGCTAATG	0.974434	0.0135071	1.19908	0.234396	1.46296	1.185	0.120986	8.9
CPSF3L/2	GGAGCUUCCUCACAUCUCUGCUGAA	UUCAGCAGAGAUGUGAGGAAGCUCC	56	10			0.989083	0.0287133	1.30826	0.136926		0.896189	0.221045	13.4
CPSF4/1	CAGCAACAAGGAAUGUCCCUUCCUG	CAGGAAGGGACAUUCCUUGUUGCUG	37	15	CTTGGTATGACCGTGGCTTC	CCCATGGGCAGTTCAAATC	0.972103	0.0217983	1.02837	0.226114	1.08056	0.963457	0.147175	ND
CPSF4/2	CACCUGUUACAAGUGUGGCGAGAAA	UUUCUCGCCACACUUGUAACAGGUG	56	9			0.899569	0.0168313	0.754745	0.14724		0.730166	0.17285	ND
CRK/1	GGAAUGAUGAGGAAGAUCUUCCCUU	AAGGGAAGAUCUUCCUCAUCAUUCC	69	6	CGTCTCCCACTACATCATCAAC	CCAGTAAAGCAGGCAATGAATC	0.879597	0.0356751	1.09407	0.154337	1.36128	0.436999	0.0024924	ND
CRK/2	CACUACAACGUUGAUAGAACCAGUU	AACUGGUUCUAUCAACGUUGUAGUG	86	4			0.919001	0.0266412	0.514779	0.0322634		1.06798	0.209958	ND
CYTH4/1	GGUCUCUACUCGGAAGAAGAAGAUU	AAUCUUCUUCUUCCGAGUAGAGACC	45	21	AATCGTACCGCATCTCAGC	CTCCAGGAATCTCACTGCTTG	0.922683	0.0262935	0.399357	0.144583	1.20729	1.72651	0.322086	ND
CYTH4/2	CAGGACAUUGCACGGUUCCUGUAUA	UAUACAGGAACCGUGCAAUGUCCUG	n.s.				0.907113	0.0387969	1.21386	0.314213		0.648068	0.142918	ND
DCTN2/1	GCAUUGCCAGGAAUGAGCCAGAUGU	ACAUCUGGCUCAUUCCUGGCAAUGC	88	3	CCTAAATACGCCGACCTTCC	GTGTTCCACACTTGTGCTTGTC	0.882318	0.0288882	n.t.	n.t.	0.543122	0.748459	0.112209	ND
DCTN2/2	GGACCAGAUGCUGCAAUCAACCUUA	UAAGGUUGAUUGCAGCAUCUGGUCC	93	2			0.938553	0.0333017	1.04736	0.257425		0.891577	0.402921	ND
DDX56/1	GAGCUGAUAUUACAUAACCCGGUUA	UAACCGGGUUAUGUAAUAUCAGCUC	66	5	GAACACATGGGCCTCGATCC	TCCTATGGAGCAACAGCTGC	0.988743	0.0315066	1.08219	0.562396	1.01143	1.12185	0.146692	ND
DDX56/2	CGGGAUGUCCGAGUGGCCAAUGUCU	AGACAUUGGCCACUCGGACAUCCCG	18	16			0.986942	0.0330599	1.06168	0.299938		0.586193	0.0163765	ND
DLG4/1	GGCGAGGACGGUGAAGGCAUCUUCA	UGAAGAUGCCUUCACCGUCCUCGCC	n.s.		CATGCATGAAGATGCTGTGG	TGTCCAGGTGCTGGGAATAAG	0.926995	0.0225654	1.10189	0.284449	0.968218	1.09585	0.170691	4.1
DLG4/2	GCUCCCUGGAGAAUGUGCUAGAGAU	AUCUCUAGCACAUUCUCCAGGGAGC	n.s.				1.01889	0.036236	1.26718	0.210867		1.08814	0.245367	60.9
DUS2L/1	GGGAUCUGUGCAAGAAGCCCUUUGU	ACAAAGGGCUUCUUGCACAGAUCCC	30	21	TTGTGAAGCGGATAGAGAGGAC	GTTGGCTATGACAGGAATGGAG	0.90117	0.0230529	1.32112	0.222756	1.06366	1.16435	0.406734	11.7
DUS2L/2	GAAGCGGAUAGAGAGGACUGGCAUU	AAUGCCAGUCCUCUCUAUCCGCUUC	55	14			0.928927	0.00698584	1.19096	0.0389652		0.777904	0.291566	1.8
DYNLL1/1	CAUAGAGAAGGACAUUGCGGCUCAU	AUGAGCCGCAAUGUCCUUCUCUAUG	n.s.		TGCGGCTCATATCAAGAAGG	TTGGCCCAGGTAGAAGTAGATG	0.915498	0.0214529	0.402037	0.0823372	0.000250559	0.256595	0.027298	10.7
DYNLL1/2	CAUUCUUCUGUUCAAAUCUGGUUAA	UUAACCAGAUUUGAACAGAAGAAUG	55	14			0.908704	0.0199026	0.303808	0.042289		0.332238	0.0250528	1.1
EEF1A1/1	UGGUGGUAUUGGUACUGUUCCUGUU	AACAGGAACAGUACCAAUACCACCA	91	3	TGTCAAGGATGTTCGTCGTG	GCTTATTTGGCCTGGATGG	0.928116	0.0263806	0.208675	0.0323245	0.000471051	0.423924	0.0300125	ND
EEF1A1/2	CCAUGAAGCUUUGAGUGAAGCUCUU	AAGAGCUUCACUCAAAGCUUCAUGG	90	2			0.90192	0.0385299	0.2575	0.00707203		0.382565	0.0419783	ND
ENO1/1	GGACUACCCAGUGGUGUCUAUCGAA	UUCGAUAGACACCACUGGGUAGUCC	56	11	AGATACCTTCATCGCTGACCTG	TGAGGAGCTGGTTGTACTTGG	0.932889	0.0411342	0.759469	0.0889582	0.677913	0.987242	0.240864	ND
ENO1/2	GGAAGGGUGUCUCAAAGGCUGUUGA	UCAACAGCCUUUGAGACACCCUUCC	47	11			0.944466	0.0235902	1.00043	0.187144		1.49975	0.113984	ND
ERBB2IP/1	GCACCUCCCAGGGAGGGAAAUUUAA	UUAAAUUUCCCUCCCUGGGAGGUGC	42	10	TCCATATACACAGCCCCATTG	GGTCTGAATGGGTTTCCTCTAC	0.942625	0.0284141	0.889064	0.00982358	1.10185	1.50308	0.476825	ND
ERBB2IP/2	CCACACUGUUGUAUGAUCAACCAUU	AAUGGUUGAUCAUACAACAGUGUGG	66	8			0.957904	0.030803	1.24546	0.0629951		1.13955	0.166148	ND
GIPC1/1	GGAGGAUCUGCCCUCUGCCUUUGAA	UUCAAAGGCAGAGGGCAGAUCCUCC	47	12	ACTGCCGAGGTGATGTTCTG	TGAACACCTCCACCTCCTTG	0.925625	0.0427471	1.17883	0.238668	0.585317	1.08762	0.0621632	0.8
GIPC1/2	GAGAGUUACAUGGGUAUCAGGGACA	UGUCCCUGAUACCCAUGUAACUCUC	56	8			1.00223	0.00833933	1.1524	0.160764		1.23626	0.518369	5.4
GMEB1/1	AGUUUCUCUAUACUCUGACAGACUU	AAGUCUGUCAGAGUAUAGAGAAACU	16	9	CAGAAGGAACCAAGTAGAGCAG	CTCACAGGCATCAGTACCAC	0.971723	0.0251919	1.13552	0.462032	0.272438	0.572395	0.032661	ND
GMEB1/2	GGAGAUUGUGGUCUUAGAGGAUUAA	UUAAUCCUCUAAGACCACAAUCUCC	15	18			0.921092	0.017234	0.501258	0.114398		0.997552	0.140667	ND
GPS2/1	ACAUUAUGAUGGAGCGGGAGCGCAA	UUGCGCUCCCGCUCCAUCAUAAUGU	25	15	TATCTCAGCCACAGCCACAG	AGTCTGCTGGTTAGCATGTTCC	0.928506	0.0124308	0.696383	0.259547	0.845269	0.650305	0.0848684	ND
GPS2/2	CAUACCAGCAGAGCCUGACUGUUCA	UGAACAGUCAGGCUCUGCUGGUAUG	83	3			0.939223	0.00372908	0.83544	0.387975		1.47392	0.145897	0.8
GSN/1	CCUGCUCCAACAAGAUUGGACGUUU	AAACGUCCAAUCUUGUUGGAGCAGG	57		TGTCCTGGGAGAGCTTCAAC	GTGGCCTTCAGTCTTTCATACC	0.95115	0.00489642	0.790716	0.581275	1.67558	1.19898	0.481118	ND
GSN/2	CAGUUCUAUGGAGGCGACAGCUACA	UGUAGCUGUCGCCUCCAUAGAACUG	29				0.979788	0.00494641	1.22551	0.63735		0.607094	0.0866277	ND
HIVEP1/1	GCAGAAACAUCAAACUCCAGCUCUA	UAGAGCUGGAGUUUGAUGUUUCUGC	n.s.		TGTGTGGATTTAGGCGTCTCAG	TCCTCATCTGGGCCATCAGA	0.949629	0.0177642	1.13633	0.419499	0.907944	1.19776	0.212584	ND
HIVEP1/2	CAACCAGAUGCUGGUGGCUUGUUCU	AGAACAAGCCACCAGCAUCUGGUUG	44	11			0.975415	0.00530136	1.41057	0.387594		0.620835	0.0922244	ND
IGHG1/1	CCAGAUUCCAGUAACUCCCAAUCUU	AAGAUUGGGAGUUACUGGAAUCUGG	n.t.				0.969651	0.0149618	n.t.	n.t.	n.t.	n.t.	n.t.	ND
IGHG1/2	GAGUACAAGUGCAAGGUCUCCAACA	UGUUGGAGACCUUGCACUUGUACUC	n.t.				0.953752	0.0138964	n.t.	n.t.		n.t.	n.t.	ND
ILF3/1	CCACUGAUGCUAUUGGGCAUCUAGA	UCUAGAUGCCCAAUAGCAUCAGUGG	n.s.		TAGACAGACAGCAACGGGAAG	GGTTTCTTGGGCATCTTGG	0.991345	0.0270042	1.0618	0.336692	0.264985	0.870683	0.150286	ND
ILF3/2	GAUGGCAAAGCAUUCUUCCGUUUAU	AUAAACGGAAGAAUGCUUUGCCAUC	25	22			0.996568	0.0450898	0.723661	0.175386		1.59473	0.360627	1.8
KAZN/1	CCAUGAAAGCUGAUCGGAAGCGCUU	AAGCGCUUCCGAUCAGCUUUCAUGG	n.s.		TGGATGTTTGGCCTCCTAAG	AAGCCACATGCCAGAGATTC	1.02754	0.226033	1.25551	0.241273	1.0578	1.14678	0.255863	ND
KAZN/2	CCAGAUGCAGCAGCUGUAUGCCACA	UGUGGCAUACAGCUGCUGCAUCUGG	n.s.				0.923283	0.00762609	0.972528	0.163796		1.13449	0.201687	ND
KCTD6/1	CAGAAUUGACCUUACCGUUGGAUUU	AAAUCCAACGGUAAGGUCAAUUCUG	64	8	TTGAAGACGCATCACTGGAG	TAACGCGTCAATGTGGTGAG	0.942195	0.0158959	1.30958	0.32474	1.26578	1.43785	0.484899	ND
KCTD6/2	UCCUAAGCCUUUGUAUCCCAUGGAU	AUCCAUGGGAUACAAAGGCUUAGGA	49	10			0.889082	0.0077549	0.709192	0.205539		0.75386	0.229653	1
LAMB1/1	GGACAGCAUUGAAGCAGUUGCUAAU	AUUAGCAACUGCUUCAAUGCUGUCC	69	3	AACGTGGTTGGAAGAACCTG	CAGTGACGGGATTGCAGAAG	0.961597	0.0150683	1.09186	0.223056	0.562448	1.27015	0.243988	ND
LAMB1/2	CAGUGAAGAUCCAUUUGGUUGUAAA	UUUACAACCAAAUGGAUCUUCACUG	61	6			0.969641	0.0110325	1.23717	0.257209		1.25144	0.372984	ND
LAMC3/1	CCUUGCAGAGGAAACUCAGUCUGCU	AGCAGACUGAGUUUCCUCUGCAAGG	71	5	TACAAGAGGGAGATGCCACAG	CAAACAGCGTTCACAGGATG	0.946687	0.00863062	1.09247	0.213378	0.236888	1.13895	0.230281	ND
LAMC3/2	CCAGCCUCCUGGGUGGAGAUUUGUU	AACAAAUCUCCACCCAGGAGGCUGG	48	10			0.986682	0.0240879	0.98322	0.300705		0.947275	0.102216	ND
LRRCC1/1	ACUUACUUCAGUGUAUGGUAGGAUU	AAUCCUACCAUACACUGAAGUAAGU	78	9	CTGGGTGCCGGTTAAGAC	AGTCCTCTGCAAGCCTTTG	0.98331	0.0135736	1.11364	0.345797	0.236922	0.934331	0.287759	ND
LRRCC1/2	AAGCCAGAAGAUUUCAAGAUGUUAA	UUAACAUCUUGAAAUCUUCUGGCUU	86	6			0.851169	0.028132	0.883407	0.28777		1.30623	0.122306	ND
MAP3K3/1	GCCGGCCUGUGAAAUAUGAAGAUGU	ACAUCUUCAUAUUUCACAGGCCGGC	53	14	GAGAGGAATGTGCCAACCA	ACAAATAGACCCTGCCGAAG	0.995908	0.0179619	0.901326	0.0735412	0.343559	1.66582	0.375227	ND
MAP3K3/2	UCCUUGUCUGGAAGCUGCCAAUCCU	AGGAUUGGCAGCUUCCAGACAAGGA	26	26			0.984681	0.045974	0.8343	0.119505		0.970141	0.140408	8.9
MAPK9/1	GCCAACUGUGAGGAAUUAUGUCGAA	UUCGACAUAAUUCCUCACAGUUGGC	53	9	TCTGCGTCACCCATACATCAC	CTCTTTCTTCCAACTGGGCATC	1.03841	0.0409173	1.9192	0.365408	3.50096	0.821108	0.0984379	ND
MAPK9/2	ACGUUACCAGCAGCUGAAACCAAUU	AAUUGGUUUCAGCUGCUGGUAACGU	72	3			1.02928	0.0234289	1.82678	0.219109		0.866498	0.0564787	ND
MBIP/1	CCGAGAGGUGCUCUACGAAAUCUUU	AAAGAUUUCGUAGAGCACCUCUCGG	58	8	GAATTGGAAGGCATCTCTCCTG	TCTGAGGAGGGCTTGTTTGAG	1.03346	0.0264216	1.70882	0.303002	0.983539	1.31189	0.312835	14.3
MBIP/2	ACAGCAUGCUUCGAGACUGUGGUAA	UUACCACAGUCUCGAAGCAUGCUGU	27	18			1.02338	0.0410714	0.811657	0.356716		1.26397	0.215919	9.9
NIN/1	GCCAGGGUUAGUAAUGUCUUCUUGU	ACAAGAAGACAUUACUAACCCUGGC	32	24	CAAGAGAATGAGAGGCTCCAG	TTGCTCTGTGGGATTCATGG	1.03512	0.0203778	1.84108	0.446183	1.72936	1.08202	0.360019	6.7
NIN/2	GGAGGCGGAGCUCUCUGAAGUUAAA	UUUAACUUCAGAGAGCUCCGCCUCC	n.s.				1.02737	0.0160831	n.t.	n.t.		2.2323	0.919003	ND
NKRF/1	GCAAAUGAUGCAAUUGGUAUCCUUA	UAAGGAUACCAAUUGCAUCAUUUGC	13	19	TGGCTGAAGGTATTGATATTGGG	GTCTCGCATGGAATTTGGAAC	1.05512	0.0135982	1.18778	0.211449	0.580832	0.432083	0.19299	ND
NKRF/2	CAGCCUGUAACAGCCAACAUGUAUU	AAUACAUGUUGGCUGUUACAGGCUG	73	7			0.978367	0.0128345	1.26585	0.15981		1.67248	0.522398	12.3
N-PAC/1	CCUCCUUGGCCAGGAAAGAUUGUUA	UAACAAUCUUUCCUGGCCAAGGAGG	75	6	ACCAGGCAATCACGAAGAAG	CCACTTCCCATGAGACCAAG	1.02485	0.0145384	1.36352	0.116645	2.09755	2.21416	0.186967	ND
N-PAC/2	GGUCUCAUGGGAAGUGGAAUCGUCU	AGACGAUUCCACUUCCCAUGAGACC	79	8			0.945777	0.054776	1.35822	0.0446549		2.4504	0.368485	ND
NUP214/1	GCGAGAGACACUGUUUAACACCCUA	UAGGGUGUUAAACAGUGUCUCUCGC	65	8	GCAGGGACATCAGTGGAAAG	AAGTGCCCACTTGGAAACAG	0.998029	0.0672659	0.805585	0.0473952	0.984022	0.948628	0.224522	0.6
NUP214/2	GCUGAAUCACCUGGUGGAUAGUCUU	AAGACUAUCCACCAGGUGAUUCAGC	61	5			1.03293	0.0722433	1.02657	0.158429		1.06379	0.166589	25.6
PIAS3/1	GGCUCCCUAUGAAUCUCUUAUCAUU	AAUGAUAAGAGAUUCAUAGGGAGCC	37	9	CCATGAAACCATTGCCCTTC	AAAGTGCGCTTCCTCAAACC	1.03871	0.0274425	1.45955	0.0832882	3.47274	2.71683	0.291017	ND
PIAS3/2	CAUCCCGGCCCUACCUGGAAGCAAA	UUUGCUUCCAGGUAGGGCCGGGAUG	n.s.				1.00706	0.0276693	1.36101	0.220792		1.90849	0.558039	14.2
PIK3R1/1	CCAACAGGAUCAAGUUGUCAAAGAA	UUCUUUGACAACUUGAUCCUGUUGG	46	9	AGAAGTTGAACGAGTGGTTGG	AGGTTTTCAGCTTTGTTTCGG	1.00115	0.0404806	1.97798	0.27909	5.01722	2.90993	0.0842914	36.1
PIK3R1/2	UGGAAUGUUGGAAGCAGCAACCGAA	UUCGGUUGCUGCUUCCAACAUUCCA	16	29			1.01853	0.0109642	1.36689	0.0701026		4.12038	0.5235	ND
PIK3R2/1	CCUCGGACAACAGAGAGAUCGACAA	UUGUCGAUCUCUCUGUUGUCCGAGG	49	12	AACGAGAAACTCCGGGACAC	AGAAGCCATAGTGCCCATCTC	1.01293	0.00901216	2.11049	0.427508	1.11726	2.03899	0.411397	24.8
PIK3R2/2	GGACCUCCCAGGAGCUGCAGAUGAA	UUCAUCUGCAGCUCCUGGGAGGUCC	58	10			1.03322	0.000592307	1.27823	0.540598		1.05403	0.157063	10.6
POLR3F/1	UCAAAUCAUAGAGGAUGCAGGAAAU	AUUUCCUGCAUCCUCUAUGAUUUGA	40	11	GGCAGTCAATCCAATCATCC	CACCTTCGTGGCAGTCATC	1.02286	0.0359116	0.979236	0.33445	1.48472	0.93143	0.318898	6.2
POLR3F/2	GAAUCUGAAUUUGUAGAGGUGCUUA	UAAGCACCUCUACAAAUUCAGAUUC	25	10			1.02596	0.0220131	1.27645	0.452313		1.11881	0.422979	17.9
POM121/1	CAAAUAUUCCUUGAUGGCCAGGAAA	UUUCCUGGCCAUCAAGGAAUAUUUG	78	6	GCCGTCGCTGTACGGTGA	TGTTGCCACCTCATAAGCCA	1.0329	0.0161199	1.07015	0.410927	1.71557	0.949932	0.131569	0.1
POM121/2	CAGAGCUCAGAUGACCACUUGAAUA	UAUUCAAGUGGUCAUCUGAGCUCUG	78	6			1.00238	0.054288	1.54742	0.360395		0.824111	0.014949	ND
POMP/1	UGAAAGUCAUGAUCUUCUUCGGAAA	UUUCCGAAGAAGAUCAUGACUUUCA	81	3	AAGGCAGTGCAGCAGGTTC	TCTCCCATGACTTCGCTTTG	0.962307	0.0360644	0.92348	0.465056	0.994237	1.31173	0.29338	ND
POMP/2	GGAUAUUCUUAAUGAUCCAUCACAA	UUGUGAUGGAUCAUUAAGAAUAUCC	60	6			0.996038	0.0984969	1.40953	0.484846		2.32083	0.828979	49.8
PREPL/1	CCUCUGAAAGGAAUUGUAAGUUAUA	UAUAACUUACAAUUCCUUUCAGAGG	36	12	GGTTGTTGCTTGGTTCGTTC	CAATCAATGAAGGGCTGGTC	0.952081	0.0203063	1.47605	0.122198	2.19499	2.11182	0.206851	21
PREPL/2	CAUGUAAGGAUCUUCAGCCUGUUAA	UUAACAGGCUGAAGAUCCUUACAUG	n.s.				0.928937	0.0228029	0.529899	0.0433287		0.970341	0.451598	6
PRKRA/1	CACCGAUUCAGGUAUUACACGAAUA	UAUUCGUGUAAUACCUGAAUCGGUG	81	4	CGAAACATAGAGCTGCAGAGG	CTGGTTCTTTGGTTGCTTGG	0.945287	0.0186003	1.17852	0.0818696	0.759697	1.49944	0.400809	4.8
PRKRA/2	CCAGCUUAAUCCUAUUGGUUCAUUA	UAAUGAACCAAUAGGAUUAAGCUGG	83	6			0.928456	0.0174246	1.02323	0.110984		0.750441	0.14415	57.4
RPL13A/1	CCAUCGUGGCUAAACAGGUACUGCU	AGCAGUACCUGUUUAGCCACGAUGG	80	4	CAAGCGGATGAACACCAAC	GCCGTCAAACACCTTGAGAC	0.951921	0.0222108	0.651	0.0500323	0.117617	0.756112	0.130215	31.3
RPL13A/2	CGUGCGUCUGAAGCCUACAAGAAAG	CUUUCUUGUAGGCUUCAGACGCACG	79	7			0.953452	0.0149676	0.647914	0.0565322		0.496006	0.151102	13
RPL23A/1	GGAAGAGGCUGUGUAUGAAACCAAU	AUUGGUUUCAUACACAGCCUCUUCC	n.s.		ACTCCGGAGACAGCCCAAAT	TCATGGCAGACTCAGTGGTCA	0.968921	0.0285127	1.38222	0.0578884	1.6805	1.21301	0.276028	ND
RPL23A/2	GGUUUGAAGGGUGUUAGCAUCCAUU	AAUGGAUGCUAACACCCUUCAAACC	n.s.				0.986952	0.0227462	0.933669	0.163652		0.671037	0.0931847	22.2
RPSA/1	GAGCCCUUGAUGUCCUGCAAAUGAA	UUCAUUUGCAGGACAUCAAGGGCUC	78	5	GCTCGTGCAATTGTTGCCAT	CAGTGGCAGCAGCAAACTTC	0.942245	0.0340688	0.562701	0.108213	5.01118e-05	0.439294	0.016284	ND
RPSA/2	GCCUCUCACGGAGGCAUCUUAUGUU	AACAUAAGAUGCCUCCGUGAGAGGC	75	6			0.949779	0.0348975	0.593593	0.363617		0.44008	0.0266789	ND
SCRIB/1	CGGAACAGCCUGGAGAGCAUCUCUU	AAGAGAUGCUCUCCAGGCUGUUCCG	77	6	CAAGGGAGTGTCGTTTGACC	TTATAGGGTGTGGAGCCCTTG	1.02014	0.0105829	1.09236	0.150639	1.42662	0.404894	0.0355359	ND
SCRIB/2	CAGCGUCCCUGUCAUUUCUGGUCAA	UUGACCAGAAAUGACAGGGACGCUG	67	8			0.931038	0.0124426	0.72215	0.142783		1.07356	0.188221	9.7
SDHB/1	UCCUAAGGGUCUGAAUCCAGGGAAA	UUUCCCUGGAUUCAGACCCUUAGGA	86	4	AAGCTGCAGGACCCATTCTC	GCTTTCCCTGGATTCAGACC	0.95002	0.00279332	0.746526	0.174801	1.29973	1.09726	0.0704376	32.3
SDHB/2	UAAGGAGAAGAAAGCUUCAGUUUAA	UUAAACUGAAGCUUUCUUCUCCUUA	91	3			0.95131	0.0162599	0.336092	0.113829		0.743734	0.0514651	4.6
SKP1/1	UCACACUACUUGCAUGUAAAGAAUA	UAUUCUUUACAUGCAAGUAGUGUGA	n.s.		TGATGACCCAGTTCCTCTACCA	TCATCTTCAGGAGGAGGAGGG	0.972793	0.00881304	0.467479	0.139039	1.03584	1.34491	0.419074	34.3
SKP1/2	GGGACCAAGAAUUCCUGAAAGUUGA	UCAACUUUCAGGAAUUCUUGGUCCC	75	5			0.975705	0.0203701	1.01787	0.225003		0.665077	0.100286	ND
SNAPC3/1	UGAGGGCGGUGUGCGGCCUUGAUAA	UUAUCAAGGCCGCACACCGCCCUCA	31	13	AGAAGCATTGGCTATGGACCAG	TAGTGCAGCATTCGGAAGCA	0.974204	0.0201811	0.631326	0.11571	1.30141	0.53457	0.029194	16.6
SNAPC3/2	UGGAAAGUUUCAGACUGCUAGAAUG	CAUUCUAGCAGUCUGAAACUUUCCA	77	5			0.974264	0.0126708	0.616043	0.0199998		0.625691	0.05297	16.2
SNAPC4/1	GAGAGAAGAUAACACAGGAGAUCAA	UUGAUCUCCUGUGUUAUCUUCUCUC	41	5	GAGTGGCAGAAGATTGCAGAG	CCACTCCTTGCGTTTCAGAG	1.00794	0.0144564	0.768962	0.23027	1.0388	0.675036	0.0705066	ND
SNAPC4/2	UCUCGAGUCAGAUUCUGAAGCAGAU	AUCUGCUUCAGAAUCUGACUCGAGA	25	15			1.00126	0.00599036	0.456061	0.0759982		1.22113	0.191658	1.7
SNX4/1	GAAACAUAUACUGCUUACCUCAUUG	CAAUGAGGUAAGCAGUAUAUGUUUC	29	30	GATTGCTTCACATCCCATCC	CCCAGTTTCATTCACAGTCTCC	1.02056	0.0185999	1.0816	0.305823	1.06761	0.584954	0.182771	ND
SNX4/2	CAGAUCGACUCUAUGGUGUAUAUAA	UUAUAUACACCAUAGAGUCGAUCUG	26	32			1.04377	0.0168782	0.630734	0.248938		1.5015	0.0854982	23.3
SON/1	GCCUUCAGCAGUGCCUACUGAUUAU	AUAAUCAGUAGGCACUGCUGAAGGC	63	14	CACCCATTGAAGGAAACCAG	TTCTGGAGCCCTCTTTCAAGTC	0.854161	0.00638384	0.406302	0.286056	0.0388318	0.397019	0.043818	14.4
SON/2	GGAGAUUGCAUUGCAUUCAGGUGAA	UUCACCUGAAUGCAAUGCAAUCUCC	74	7			0.775113	0.0147904	0.52325	0.148534		0.408937	0.0474181	14.3
STAU1/1	CCCAUUUCCAGUUCCACCUUUACUU	AAGUAAAGGUGGAACUGGAAAUGGG	35	10	AATCCGATTAGCCGACTGG	TTCCAACCTTCACCTGCATC	0.942705	0.0122759	n.t.	n.t.	0.808105	0.893618	0.269049	ND
STAU1/2	GGGAGGACAGCAAUUUAAUGGCAAA	UUUGCCAUUAAAUUGCUGUCCUCCC	38	18			0.926035	0.0575318	0.787547	0.306984		0.660888	0.210395	ND
STAU2/1	GAGGAAUGCCUCGACGUCGAGAAUU	AAUUCUCGACGUCGAGGCAUUCCUC	30	22	CTGAATCTACGCTTCCCAAACC	AAGCCCATTCAGTTCCACAG	0.882008	0.116174	1.06882	0.198015	1.17732	0.848029	0.0427628	ND
STAU2/2	CCAAGCACUGCAGAAUGAACCUAUU	AAUAGGUUCAUUCUGCAGUGCUUGG	82	4			0.900809	0.101672	0.634777	0.155037		0.619263	0.0869983	6.9
STRBP/1	GACCCAACAGAUGCUCUGAGCUAUA	UAUAGCUCAGAGCAUCUGUUGGGUC	56	20	AGATCCTCCGGACTTATTGGAC	CATTTGCCCTTGCCTGAAAC	0.877495	0.0523674	0.855225	0.24455	1.31175	0.836207	0.28166	5.2
STRBP/2	GCAUGCACUCAGACUAUCAGCCUUU	AAAGGCUGAUAGUCUGAGUGCAUGC	44	13			0.870521	0.0805124	0.51155	0.157896		0.733809	0.182538	6.4
TARBP2/1	CCAUGACCUGUCGAGUGGAGCGUUU	AAACGCUCCACUCGACAGGUCAUGG	60	12	GAATGAGTGAAGAGGAGCAAGG	AGGCGTCTTCCCTATTCTGG	0.984661	0.0323906	0.913069	0.109586	1.86749	2.30385	0.777872	ND
TARBP2/2	GCCUUUCACGUCAGCUACCUGGAUA	UAUCCAGGUAGCUGACGUGAAAGGC	58	18			0.965229	0.0353267	0.323194	0.153247		0.615455	0.0851813	ND
TAX1BP3/1	CCGUGGUGCAAAGAGUUGAAAUUCA	UGAAUUUCAACUCUUUGCACCACGG	35	31	TGTGGACAAGGTGGATGAAGAG	GGTGGGCCGCTTAAACTTG	0.993326	0.0182597	0.779832	0.192275	2.63115	0.90606	0.0785554	ND
TAX1BP3/2	AAGCUGCGUCAAGGUGAGAACUUAA	UUAAGUUCUCACCUUGACGCAGCUU	86	4			1.05233	0.00447518	1.30958	0.0897941		1.80759	0.129076	19.9
TNNI3/1	GAGUGAGGAUCUCUGCAGAUGCCAU	AUGGCAUCUGCAGAGAUCCUCACUC	20	23	GTGGACAAGGTGGATGAAGAG	CGCTTAAACTTGCCTCGAAG	1.05654	0.026225	0.615081	0.139979	2.16137	0.945243	0.164958	4.7
TNNI3/2	CCGCUCCUCCAACUACCGCGCUUAU	AUAAGCGCGGUAGUUGGAGGAGCGG	n.s.				0.960586	0.0217215	1.20635	0.287663		0.541678	0.21217	ND
TXNDC9/1	GGAACAAACUUCACAAAGCUGGAAA	UUUCCAGCUUUGUGAAGUUUGUUCC	26	20	CACTTCTCAGGCGTCACCGA	GCTGATGCTCCAGGACTTTGG	0.95067	0.0124266	0.812812	0.239025	3.43176	0.845418	0.162623	ND
TXNDC9/2	CAGCAGAAACAAGAAUGGCUUUCUA	UAGAAAGCCAUUCUUGUUUCUGCUG	82	4			0.907954	0.0585961	1.01133	0.494082		0.694947	0.0686749	16.8
VAC14/1	GAGGUCAGAGGCCCUUUCAUCAUCA	UGAUGAUGAAAGGGCCUCUGACCUC	24	9	TGGATGCGGGAGTTCATC	ACACGTTGGCCACTTCTTTG	0.876405	0.143574	0.925494	0.412703	4.18843	0.874256	0.16631	ND
VAC14/2	GAUGGUUCCUGUGACUCCAGCUUCA	UGAAGCUGGAGUCACAGGAACCAUC	58	6			0.867939	0.130407	0.750806	0.386016		0.898792	0.0958542	9.4
ZBTB17/1	UCAGCGUGGUCACUGUGGAUGACAU	AUGUCAUCCACAGUGACCACGCUGA	n.s.		GTCAGAAAAGAGTAGCCTGGG	CCTTAAAGTGAACACCGTCCA	0.891964	0.0748352	1.55688	0.642387	1.77634	1.02451	0.156568	12.1
ZBTB17/2	CACGAGUGGCAUGGCUGCUGCAGAA	UUCUGCAGCAGCCAUGCCACUCGUG	n.s.				0.952551	0.0392031	0.808946	0.408361		0.784261	0.15911	2.8
ZMYM2/1	CAGCAUGCCUGAUGUACCAUAUGAA	UUCAUAUGGUACAUCAGGCAUGCUG	16	33	TGGCAGGCATCTTGGAAC	TTCTGCAGGAAATCCGCTAC	0.972693	0.0324082	0.573852	0.227726	0.615174	0.690818	0.0119767	ND
ZMYM2/2	CCCUGUCUGGUAUACGUCUACUUCA	UGAAGUAGACGUAUACCAGACAGGG	59	10			0.983	0.00655901	1.00598	0.229989		0.995116	0.104111	7
ZWINT/1	GCCUCACCAAGGCCCUGACUCAGAU	AUCUGAGUCAGGGCCUUGGUGAGGC	77	8	TGGCAGGCATCTTGGAAC	TTCTGCAGGAAATCCGCTAC	1.01272	0.0183863	0.692058	0.163082	0.788708	0.685596	0.156235	ND
ZWINT/2	CAGGCAUCUUGGAACCUGUAGGCCU	AGGCCUACAGGUUCCAAGAUGCCUG	67	16			1.03277	0.0657	0.840771	0.541634		1.19949	0.299568	ND
ZYX/1	GGGAGAAGGUGAGCAGUAUUGAUUU	AAAUCAAUACUGCUCACCUUCUCCC	64	9	CAGCTAATGCAGGACATGGAG	CCGCAGAGTTCGTTGACAG	1.01767	0.0404344	1.31046	0.309787	0.907218	1.16863	0.12096	ND
ZYX/2	CAUGACCAAGAAUGAUCCUUUCAAA	UUUGAAAGGAUCAUUCUUGGUCAUG	82	3			0.969201	0.0464589	1.39487	0.53118		0.745189	0.0284526	ND
CSNK2B/1	GACUCAAUGAGCAGGUCCCUCACUA	UAGUGAGGGACCUGCUCAUUGAGUC	79	7	TCCTGGATTTCCTGGTTCTG	TGTCTAGAGCTTGTCGGTAGTGAG	0.872532	0.0387985	1.34851	0.0641638	4.43347	1.62145	0.0806499	ND
CSNK2B/2	CCAACCAGAGUGACCUGAUUGAGCA	UGCUCAAUCAGGUCACUCUGGUUGG	92	2			0.931518	0.0155333	1.83484	0.157518		1.57699	0.342717	ND

## Sheet: histo_efficiency
A/H1N1/Puerto Rico/8/1934				A/H1N1/New Caledonia/2006
ADAR1/1	0.634203	0.0354528		ADAR1/1	0.594145	0.0620358
ADAR1/2	0.584683	0.186227		ADAR1/2	0.49217	0.0358835
ATP6V1G1/1	0.628838	0.169412		ATP6V1G1/1	0.532928	0.0346347
ATP6V1G1/2	0.609335	0.183049		ATP6V1G1/2	0.651027	0.14621
EEF1A1/1	0.208675	0.0323245		EEF1A1/1	0.423924	0.0300125
EEF1A1/2	0.2575	0.00707203		EEF1A1/2	0.382565	0.0419783
N-PAC/1	1.36352	0.116645		N-PAC/1	2.21416	0.186967
N-PAC/2	1.35822	0.0446549		N-PAC/2	2.4504	0.368485
RPL13A/1	0.651	0.0500323		RPSA/1	0.439294	0.016284
RPL13A/2	0.647914	0.0565322		RPSA/2	0.44008	0.0266789
RPSA/1	0.562701	0.108213		SON/1	0.397019	0.043818
RPSA/2	0.593593	0.363617		SON/2	0.408937	0.0474181
SON/1	0.406302	0.286056		CSNK2B/1	1.62145	0.0806499
SON/2	0.52325	0.148534		CSNK2B/2	1.57699	0.342717
CSNK2B/1	1.34851	0.0641638
CSNK2B/2	1.83484	0.157518
